# Supplementary material for: A Toxicogenomic Approach for the Prediction of Murine Hepatocarcinogenesis Using Ensemble Feature Selection
Source: PubMed Central journal article supplement (PMC3769381; doi:10.1371/journal.pone.0073938), 2013-09-10
Supplement: pone.0073938.s005.pdf [file pone.0073938.s005.pdf]

### Expression profiles of most frequently selected informative genes

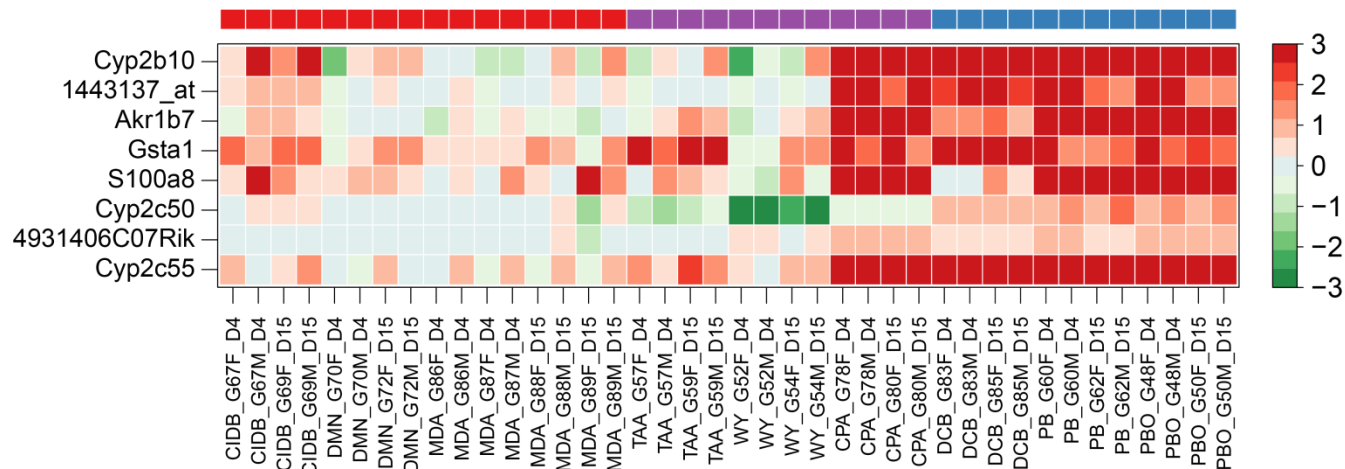

**Figure S5: Expression profiles of most frequently selected signature genes**

The heatmap shows the expression profiles of all candidate biomarker genes which are contained in at least 3 of the 8 predicted signatures. These signatures were proposed for 4 different classification tasks (C vs. NC, GC vs. NGC, GC vs. NC, NGC vs. NC). For each classification task two treatment durations (3 days and 14 days) were considered, independently.
